# Supplementary material for: A natural food ingredient based on ergosterol: optimization of the extraction fromAgaricus blazei, evaluation of bioactive properties and incorporation in yogurts
Source: Royal Society of Chemistry journal article supplement (doi:10.1039/c7fo02007d), 2018-01-01
Supplement: c7fo02007d1.pdf [file c7fo02007d1.pdf]

Supplementary material

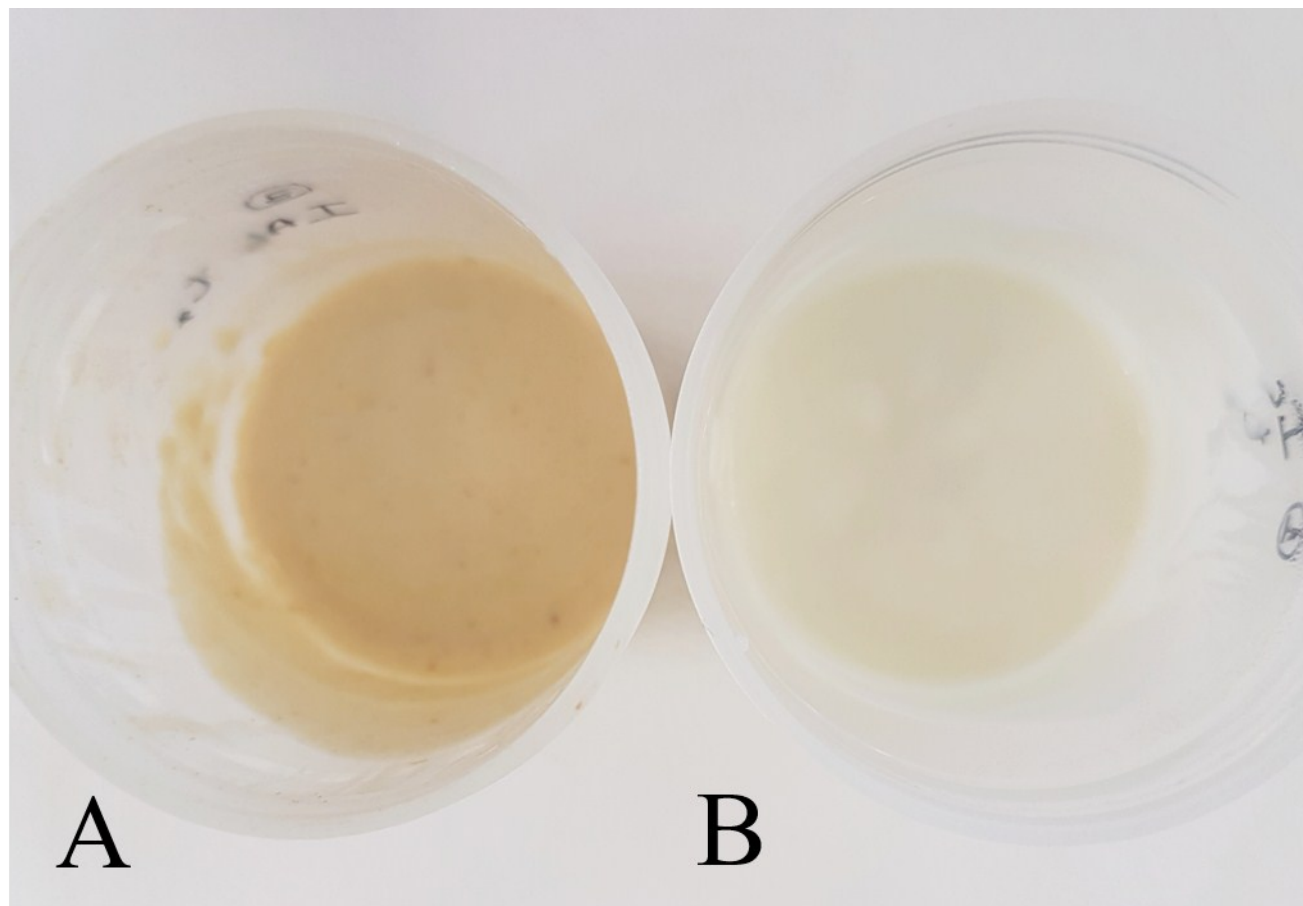

**Figure 1.** Visual appearance of the yogurt samples (A) Yogurt Fortified with *A. blazei* ergosterol-rich extract, and (B) Control yogurt.
